# Supplementary material
Source: PubMed Central journal article supplement (PMC3070757)
Supplement: NIHMS257557-supplement-1_si_001.pdf [file NIHMS257557-supplement-1_si_001.pdf]

**The Diarylheptanoid (+)-aR,11S-Myricanol and Two Flavones from Bayberry (*Myrica  
cerifera*) Destabilize the Microtubule Associated Protein Tau**

Jeffrey R. Jones,<sup>†,‡</sup> Matthew D. Lebar,<sup>§,⊥</sup> Umesh K. Jinwal,<sup>†,‡</sup> Jose F. Abisambra,<sup>†,‡</sup> John Koren  
III,<sup>†,‡</sup> Laura Blair,<sup>†,‡</sup> John C. O’Leary,<sup>†,‡</sup> Zachary Davey,<sup>†,‡</sup> Justin Trotter,<sup>||,‡</sup> Amelia G.  
Johnson,<sup>†,‡</sup> Edwin Weeber,<sup>||,‡</sup> Christopher B. Eckman,<sup>∇</sup> Bill J. Baker,<sup>⊥,\*</sup> and Chad A. Dickey<sup>†,‡,\*</sup>

*Department of Molecular Medicine, Department of Molecular Pharmacology and Physiology,  
and Alzheimer’s Institute, University of South Florida, Tampa, FL 33613, Department of  
Chemistry and Center for Molecular Diversity in Drug Design, Discovery and Delivery,  
University of South Florida, Tampa, FL 33620, Department of Neuroscience, Mayo Clinic  
Jacksonville, Jacksonville, FL 32224*

**SUPPORTING INFO**

|                                                                                                  | Page |
|--------------------------------------------------------------------------------------------------|------|
| Table of Contents                                                                                |      |
| Figure S1. LC/MS data for fraction 11 and comm. available myricetin                              | 2    |
| Figure S2. LC/MS data for (+)-aR,11S-myricanol isolated from <i>M. cerifera</i>                  | 3    |
| Figure S3. <sup>1</sup> H NMR spectrum of (+)-aR,11S-myricanol isolated from <i>M. cerifera</i>  | 4    |
| Figure S4. <sup>13</sup> C NMR spectrum of (+)-aR,11S-myricanol isolated from <i>M. cerifera</i> | 5    |
| Figure S5. UV spectrum of (+)-aR,11S-myricanol isolated from <i>M. cerifera</i>                  | 6    |
| Figure S6. CD spectrum of (+)-aR,11S-myricanol isolated from <i>M. cerifera</i>                  | 7    |

Fraction 11

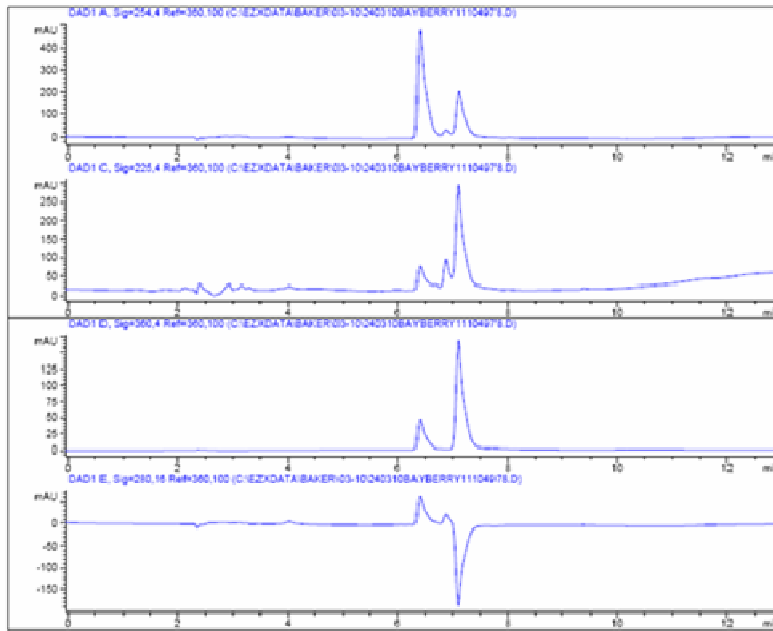

Myricetin, comm. available

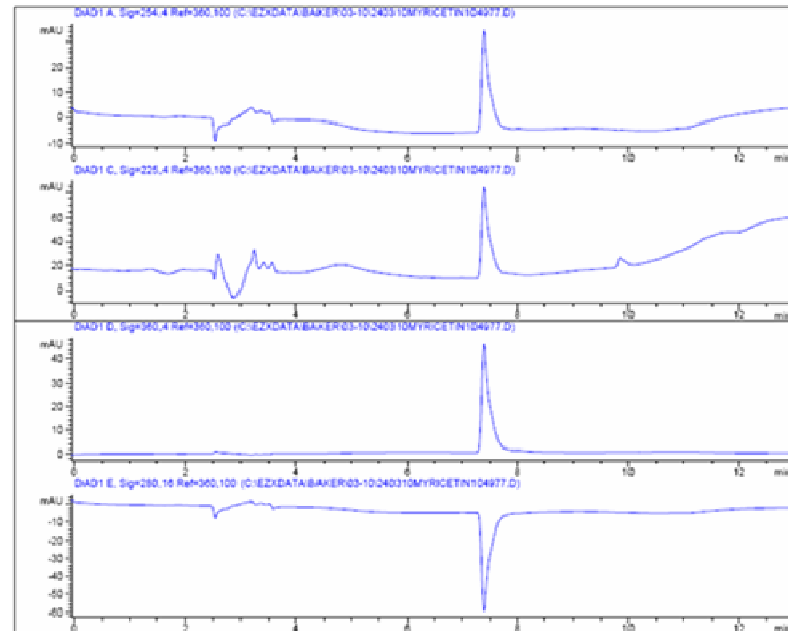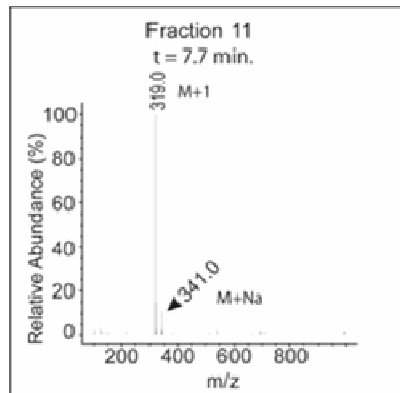

$[M-1]^- = 319.0$   
 $[M-Na]^- = 341.0$

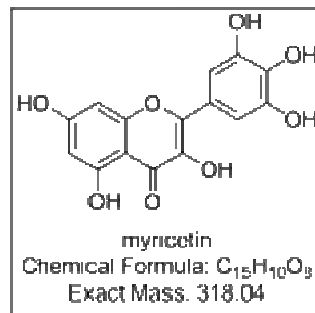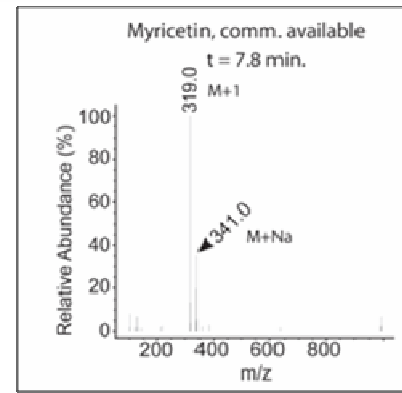

$[M-1]^- = 319.0$   
 $[M-Na]^- = 341.0$

Figure S1. LC/MS data for fraction 11 and comm. available myricetin

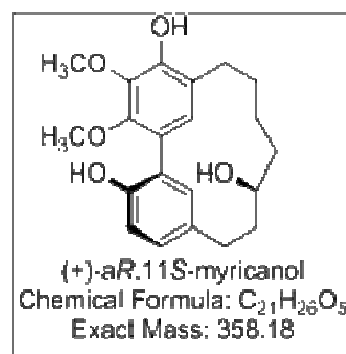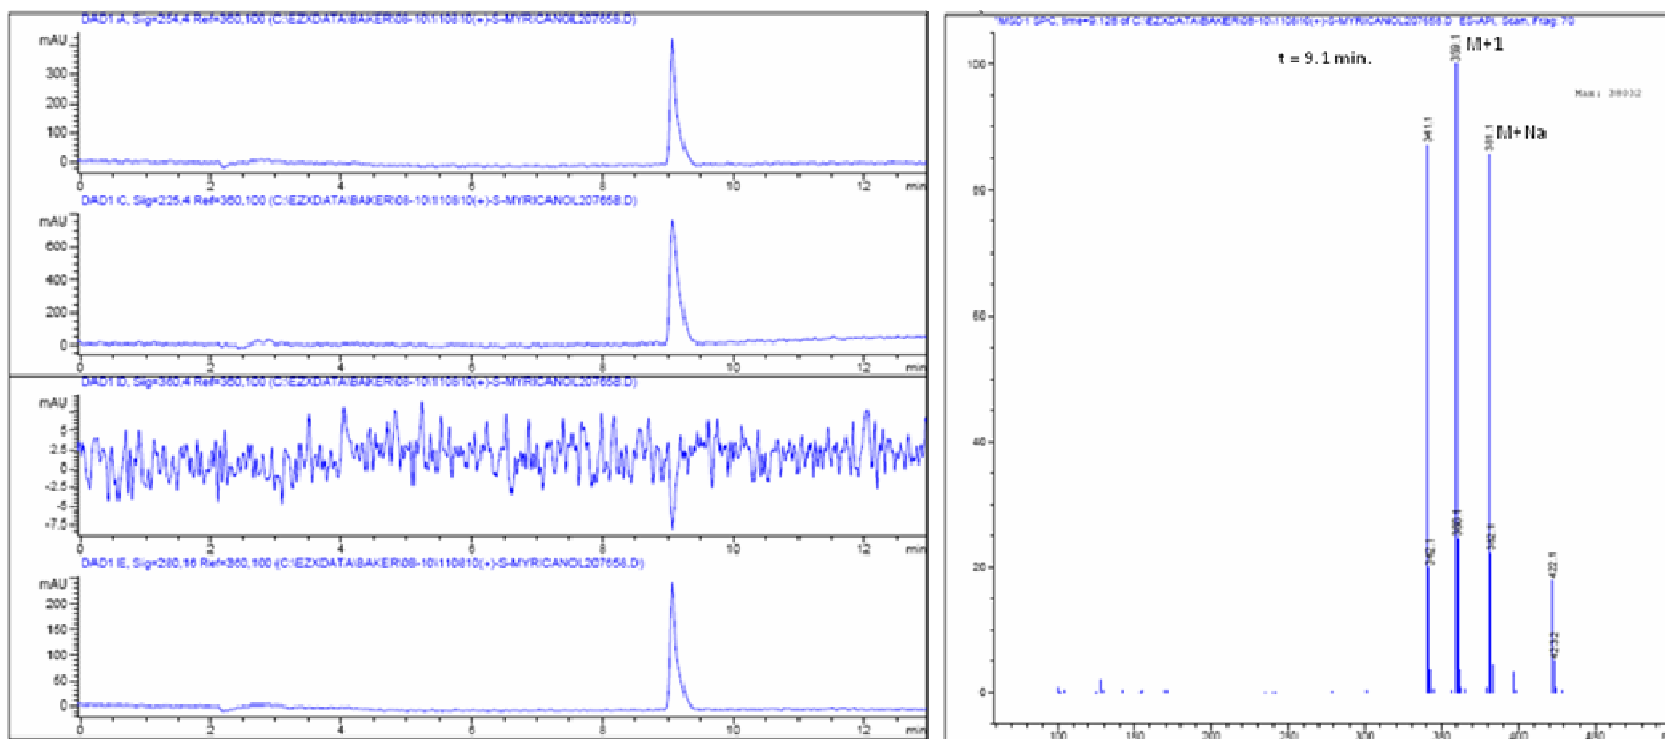

$[M-1]^+ = 359.1$   
 $[M-Na]^+ = 381.1$

Figure S2. LC/MS data for (+)-aR,11S-myricanol isolated from *M. cerifera*

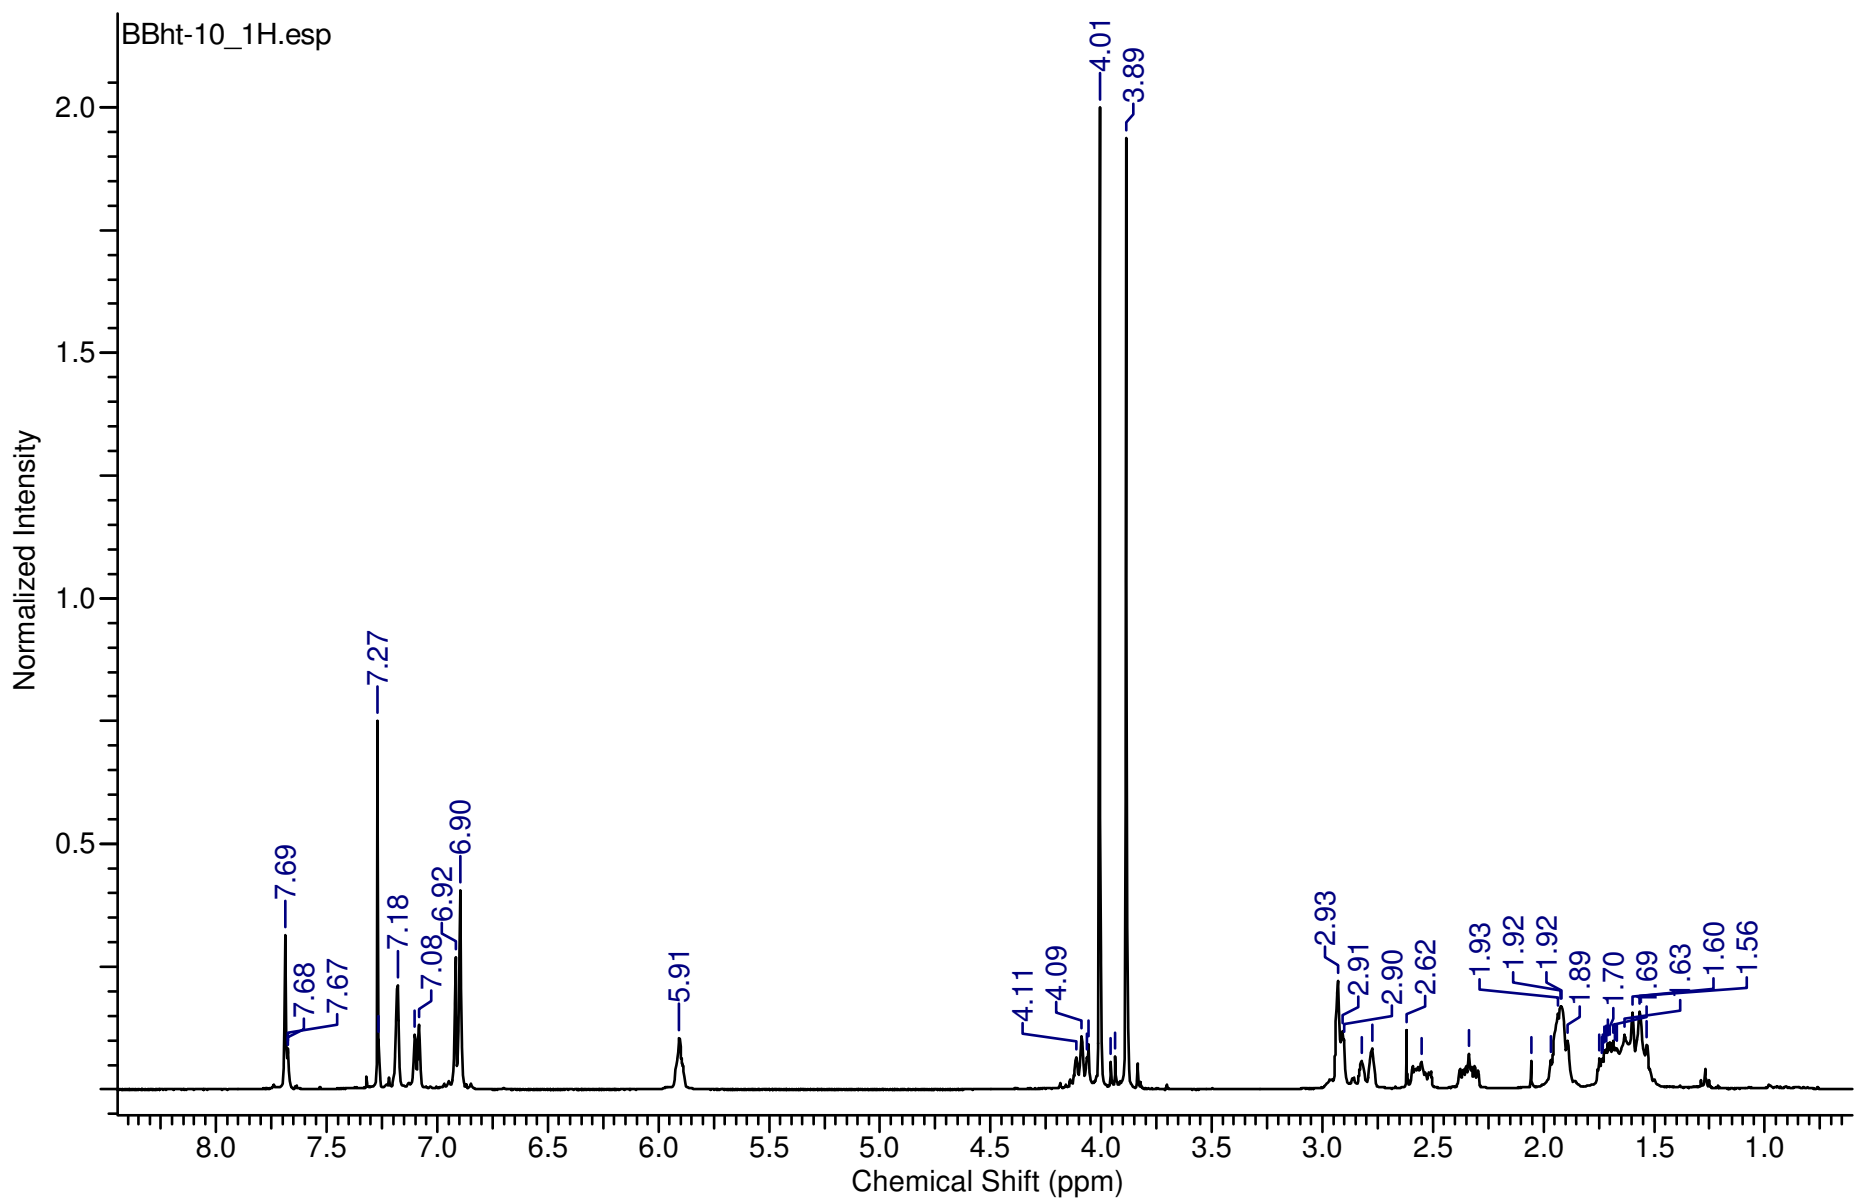

Figure S3.  $^1\text{H}$  NMR spectrum of (+)-aR,11S-myricanol isolated from *M. cerifera*

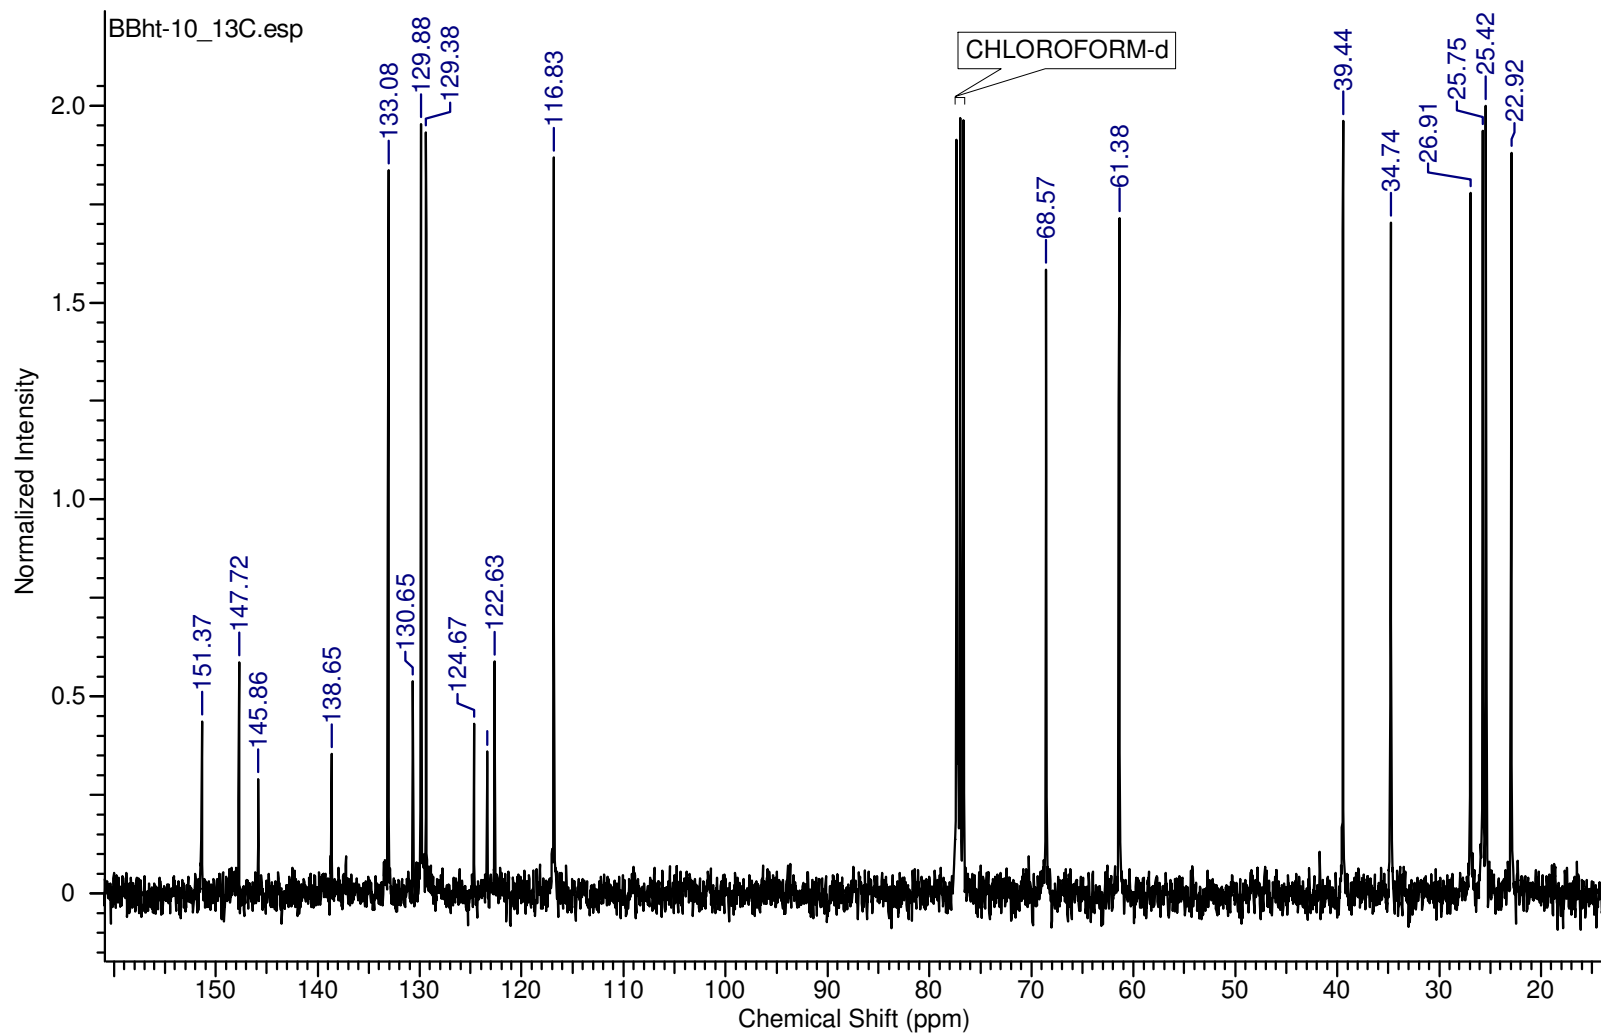

Figure S4.  $^{13}\text{C}$  NMR spectrum of (+)-aR,11S-myricanol isolated from *M. cerifera*

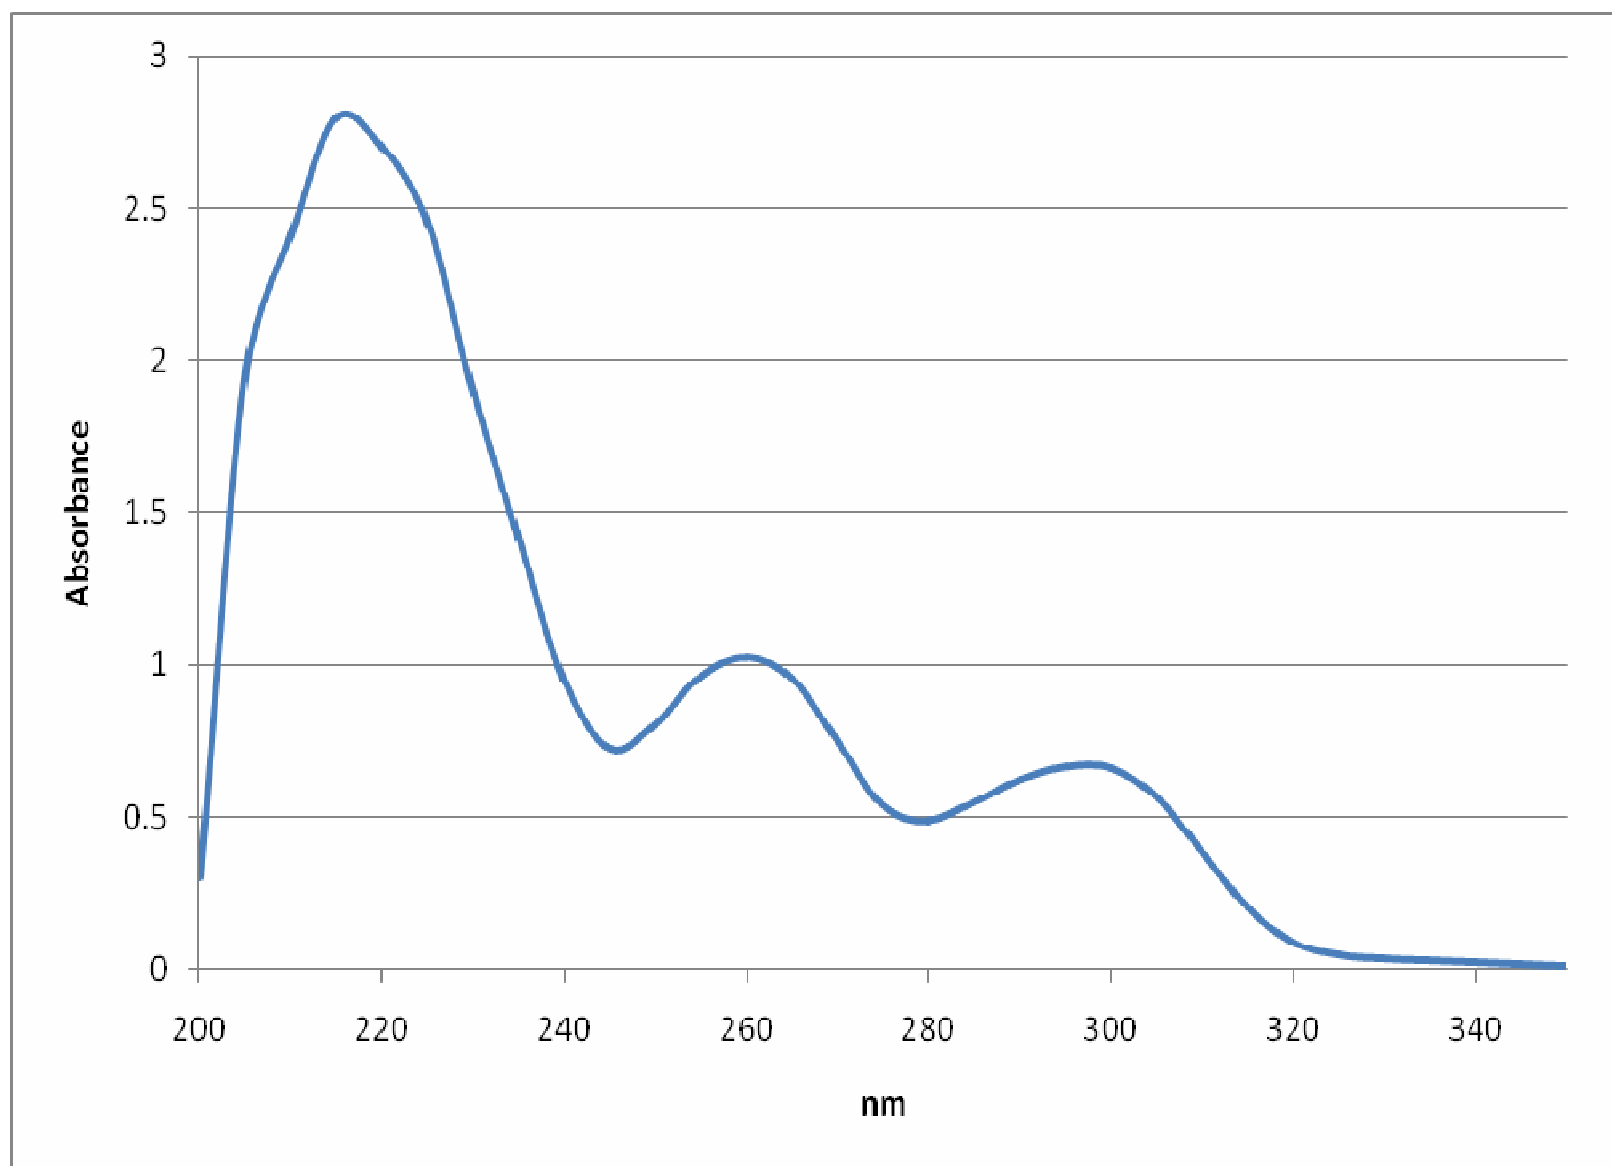

Figure S5. UV spectrum of (+)-aR,11S-myricanol isolated from *M. cerifera*

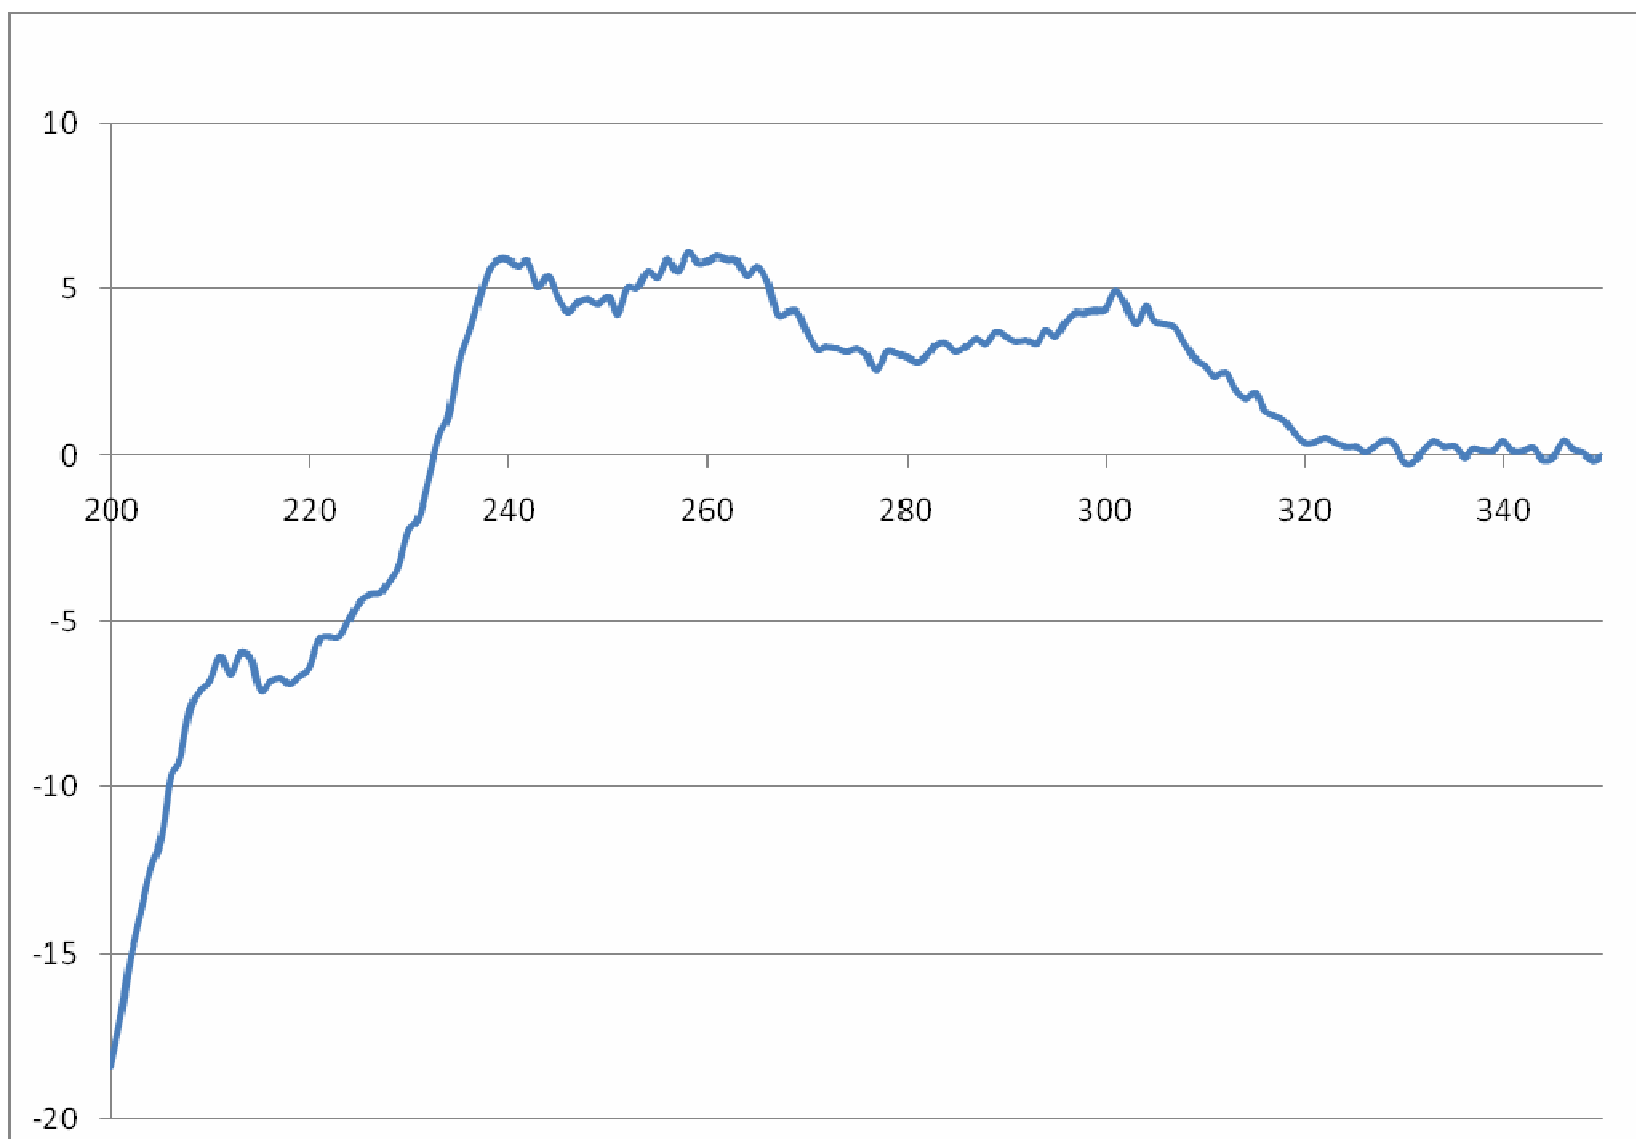

Figure S6. CD spectrum of (+)- $\alpha$ R,11S-myricanol isolated from *M. cerifera*
